# Supplementary material for: Differentiating Childhood Stroke From Mimics in the Emergency Department
Source: PubMed Central journal article supplement — Stroke. 2016 Sep 26;47(10):2476–81. doi: 10.1161/STROKEAHA.116.014179 (PMC5049943; doi:10.1161/strokeaha.116.014179), 2016-09-26
Supplement: str-47-2476-s001.pdf [file str-47-2476-s001.pdf]

## SUPPLEMENTAL MATERIAL

**Table I: Cross check of prospectively and retrospectively recruited stroke cases.**

| Variable                             | Retrospective (82) |    | Prospective (20) |    | p value |
|--------------------------------------|--------------------|----|------------------|----|---------|
|                                      | N                  | %  | n                | %  |         |
| <b>Demographics</b>                  |                    |    |                  |    |         |
| Median age at presentation (yrs)     | 8.23               |    | 7.56             |    | 0.29    |
| Sex                                  | 42                 | 51 | 6                | 30 | 0.09    |
| Well in the week before presentation | 74                 | 90 | 16               | 80 | 0.25    |
| PMHx                                 | 34                 | 41 | 10               | 50 | 0.49    |
| <b>Symptoms</b>                      |                    |    |                  |    |         |
| Sudden onset symptoms                | 69                 | 84 | 18               | 90 | 0.73    |
| Woke with symptoms                   | 17                 | 21 | 3                | 17 | 1       |
| Low GCS                              | 6                  | 7  | 3                | 15 | 0.28    |
| Focal weakness                       | 49                 | 60 | 9                | 45 | 0.32    |
| Ataxia                               | 17                 | 21 | 1                | 5  | 0.11    |
| Seizures                             | 15                 | 18 | 6                | 30 | 0.35    |
| Altered mental state                 | 24                 | 29 | 7                | 35 | 0.60    |
| Loss of consciousness                | 6                  | 7  | 3                | 15 | 0.37    |
| Speech disturbance                   | 30                 | 37 | 7                | 35 | 1       |
| Sensory disturbance                  | 11                 | 13 | 6                | 30 | 0.11    |
| Headache                             | 46                 | 58 | 12               | 60 | 1       |
| Visual disturbance                   | 15                 | 19 | 2                | 10 | 0.51    |
| Vomiting                             | 26                 | 32 | 6                | 30 | 1       |
| Dizziness                            | 15                 | 18 | 1                | 5  | 0.29    |
| Vertigo                              | 2                  | 3  | 0                | 0  | 1       |
| Other symptoms                       | 3                  | 4  | 2                | 10 | 0.25    |

\*Fishers Exact test was used to compare binary variables of interest and the Wilcoxon-Mann-Whitney Rank Sum test to compare continuous variables. Abbreviations: PMHx Past medical history. GCS: Glasgow Coma Score. Yrs: Years. Mins: minutes. N: number. %: Percentage.

**Table II: Univariate analyses of demographic factors, time course, symptoms and signs associated with AIS subtype and mimic diagnoses.**

|                             | Total                | AIS n=55      | Mimic n=280           |           |                |                |                |
|-----------------------------|----------------------|---------------|-----------------------|-----------|----------------|----------------|----------------|
| <b>Demographics Factors</b> | <b>n (%) present</b> | <b>n= (%)</b> | <b>n= (%) present</b> | <b>OR</b> | <b>95% LCI</b> | <b>95% UCI</b> | <b>p value</b> |
| Male sex                    | 156/335 (47%)        | 25/55 (45%)   | 131/280 (47%)         | 0.95      | 0.53           | 1.69           | 0.86           |
| Past medical history        | 130/355 (39%)        | 25/55 (45%)   | 105/280 (38%)         | 1.39      | 0.78           | 2.49           | 0.27           |
| Sudden symptom onset        | 244/335 (74%)        | 46/55 (84%)   | 198/276 (71%)         | 2.01      | 0.94           | 4.31           | 0.07           |
| Woke with symptoms          | 61/326 (19%)         | 11/53 (21%)   | 50/273 (18%)          | 1.17      | 0.56           | 2.43           | 0.68           |
| Well in the week prior      | 246/334 (74%)        | 44/55 (80%)   | 202/279 (72%)         | 1.52      | 0.75           | 3.10           | 0.25           |
| <b>Symptom</b>              | <b>n= (%)</b>        | <b>n= (%)</b> | <b>n= (%)</b>         | <b>OR</b> | <b>95% LCI</b> | <b>95% UCI</b> | <b>p value</b> |
| Headache                    | 187/333 (56%)        | 26/53 (49%)   | 161/280 (58%)         | 0.71      | 0.40           | 1.28           | 0.26           |
| Vomiting                    | 112/333 (34%)        | 9/53 (17%)    | 103/380 (37%)         | 0.35      | 0.16           | 0.75           | 0.007          |
| Focal weakness              | 133/331 (40%)        | 40/55 (73%)   | 93/276 (34%)          | 5.25      | 2.76           | 9.99           | <0.001         |
| Focal numbness              | 77/329 (23%)         | 9/55 (16%)    | 68/274 (25%)          | 0.59      | 0.28           | 1.27           | 0.18           |
| Visual disturbance          | 74/329 (22%)         | 8/53 (15%)    | 66/276 (24%)          | 0.57      | 0.25           | 1.26           | 0.16           |
| Seizure                     | 69/335 (20%)         | 12/55 (22%)   | 57/280 (20%)          | 1.09      | 0.54           | 2.21           | 0.81           |
| Altered mental status       | 64/333 (19%)         | 11/55 (20%)   | 53/278 (19%)          | 1.06      | 0.51           | 2.19           | 0.87           |
| Dizziness                   | 65/328 (20%)         | 7/52 (13%)    | 58/276 (21%)          | 0.58      | 0.25           | 1.36           | 0.21           |
| Speech disturbance          | 71/332 (22%)         | 28/55 (51%)   | 43/277 (16%)          | 5.64      | 3.03           | 10.50          | <0.001         |
| Ataxia                      | 54/330(16%)          | 13/54 (24%)   | 41/276 (15%)          | 1.82      | 0.90           | 3.68           | 0.10           |
| Loss of consciousness       | 35/333 (11%)         | 0/55 (0%)     | 35/278 (13%)          | 1.00      | Omitted        | Omitted        |                |
| Vertigo                     | 12/324 (3%)          | 2/50 (4%)     | 10/274 (4%)           | 1.10      | 0.23           | 5.18           | 0.90           |

| Other symptoms              | 60/344 (18%)  | 1/55 (2%)     | 59/279 (21%)  | 0.07      | 0.01           | 0.51           | 0.009          |
|-----------------------------|---------------|---------------|---------------|-----------|----------------|----------------|----------------|
| <b>Sign</b>                 | <b>n= (%)</b> | <b>n= (%)</b> | <b>n= (%)</b> | <b>OR</b> | <b>95% LCI</b> | <b>95% UCI</b> | <b>p value</b> |
| Face weakness               | 77/334 (23%)  | 36/55 (65%)   | 41/279 (15%)  | 11.00     | 5.76           | 21.01          | <0.001         |
| Arm weakness                | 63/334 (19%)  | 36/55 (54%)   | 27/279 (10%)  | 17.68     | 8.93           | 35.01          | <0.001         |
| Leg weakness                | 65/334 (19%)  | 30/55 (55%)   | 35/279 (13%)  | 8.37      | 4.42           | 15.84          | <0.001         |
| Dysarthria                  | 30/330 (9%)   | 19/52 (37%)   | 114/278 (4%)  | 13.98     | 6.12           | 31.92          | <0.001         |
| Dysphasia                   | 14/330 (4%)   | 7/52 (13%)    | 7/278 (3%)    | 6.02      | 2.02           | 17.99          | 0.001          |
| Ataxia                      | 35/336 (10%)  | 6/55 (11%)    | 29/279 (10%)  | 1.06      | 0.42           | 2.68           | 0.91           |
| Inability to walk           | 43/329 (13%)  | 14/54 (26%)   | 29/275 (11%)  | 2.97      | 1.45           | 6.10           | 0.003          |
| Abnormal eye movement       | 27/332 (8%)   | 3/55 (5%)     | 24/277 (9%)   | 0.61      | 0.18           | 2.09           | 0.43           |
| Visual defects              | 25/322 (8%)   | 4/45 (9%)     | 21/277 (8%)   | 1.19      | 0.39           | 3.64           | 0.76           |
| Facial sensory disturbance  | 17/328 (5%)   | 5/55 (9%)     | 12/273 (4%)   | 2.18      | 0.73           | 6.44           | 0.16           |
| Arm sensory disturbance     | 33/330 (17%)  | 9/55 (17%)    | 24/275 (9%)   | 2.05      | 0.89           | 4.68           | 0.09           |
| Leg sensory disturbance     | 27/329 (8%)   | 7/55 (13%)    | 20/274 (7%)   | 1.85      | 0.74           | 4.62           | 0.19           |
| GCS abnormal (<15)          | 85/335 (25%)  | 15/55 (27%)   | 70/280 (25%)  | 1.13      | 0.59           | 2.16           | 0.72           |
| GCS<9                       | 9/335 (3%)    | 0/55 (0%)     | 9/280 (3%)    | 1.00      | Omitted        | Omitted        |                |
| Abnormal pupil response     | 7/314 (3%)    | 1/54 (2%)     | 6/260 (2%)    | 0.80      | 0.09           | 6.77           | 0.84           |
| Sensory neglect             | 4/333 (1%)    | 2/55 (4%)     | 2/278 (0.7%)  | 5.21      | 0.72           | 37.79          | 0.10           |
| Other neurological signs    | 30/334 (9%)   | 7/55 (13%)    | 23/279 (8%)   | 1.62      | 0.66           | 3.99           | 0.29           |
| No focal neurological signs | 105/334 (31%) | 3/55 (5%)     | 102/279 (37%) | 0.10      | 0.03           | 0.33           | <0.001         |

OR: unadjusted odds ratios. LCI: lower 95% confidence interval. UCI: Upper 95% confidence interval. n: number. %: percentage. GCS: Glasgow coma score. Other symptoms included pain or stiffness, lethargy, gait disturbance, fever, involuntary movements, nausea and irritability. Other signs included abnormal DTRs, confusion, altered consciousness or slowed mentation, involuntary movements, papilloedema.

**Table III: Univariate analyses of demographic factors, time course, symptoms and signs associated with HS subtype and mimic diagnoses.**

|                             | Total                | HS n=37       | Mimic n=280   |           |                |                |                |
|-----------------------------|----------------------|---------------|---------------|-----------|----------------|----------------|----------------|
| <b>Demographics factors</b> | <b>n (%) present</b> | <b>n= (%)</b> | <b>n= (%)</b> | <b>OR</b> | <b>95% LCI</b> | <b>95% UCI</b> | <b>p value</b> |
| Male sex                    | 152/317 (48%)        | 21/37(57%)    | 131/280 (47%) | 1.49      | 0.75           | 2.98           | 0.26           |
| Past medical history        | 116/317(37%)         | 11/37 (30%)   | 105/280 (37%) | 0.71      | 0.33           | 1.49           | 0.36           |
| Sudden symptom onset        | 231/313 (74%)        | 33/37 (89%)   | 198/276 (71%) | 3.25      | 1.11           | 9.48           | 0.031          |
| Woke with symptoms          | 57/310 (18%)         | 7/37 (19%)    | 50/273 (18%)  | 1.04      | 0.43           | 2.50           | 0.93           |
| Well in the week prior      | 239/316(76%)         | 37/37 (100%)  | 202/279 (72%) | 1.00      | Omitted        | Omitted        |                |
| <b>Symptom</b>              | <b>n= (%)</b>        | <b>n= (%)</b> | <b>n= (%)</b> | <b>OR</b> | <b>95% LCI</b> | <b>95% UCI</b> | <b>p value</b> |
| Headache                    | 189/317 (60%)        | 28/37 (76%)   | 161/280 (58%) | 2.30      | 1.05           | 5.05           | 0.04           |
| Vomiting                    | 126/317(40%)         | 23/37 (62%)   | 103/380 (37%) | 2.82      | 1.39           | 5.73           | 0.004          |
| Focal weakness              | 104/313 (33%)        | 11/37 (30%)   | 93/276 (34%)  | 0.83      | 0.39           | 1.76           | 0.63           |
| Focal numbness              | 73/311 (23%)         | 5/37 (14%)    | 68/274 (25%)  | 0.47      | 0.18           | 1.26           | 0.14           |
| Visual disturbance          | 74/313 (24%)         | 8/37 (22%)    | 66/276 (24%)  | 0.88      | 0.38           | 2.01           | 0.76           |
| Seizure                     | 65/317 (21%)         | 8/37 (22%)    | 57/280 (20%)  | 1.08      | 0.47           | 2.49           | 0.86           |
| Altered mental status       | 72/315 (23%)         | 19/37 (51%)   | 53/278 (19%)  | 4.48      | 2.20           | 9.12           | <0.0001        |
| Dizziness                   | 66/313 (21%)         | 8/37 (22%)    | 58/276 (21%)  | 1.04      | 0.45           | 2.39           | 0.93           |
| Speech disturbance          | 48/314 (15%)         | 5/37 (14%)    | 43/277 (16%)  | 0.85      | 0.31           | 2.30           | 0.75           |
| Ataxia                      | 43/313 (14%)         | 2/37 (5%)     | 41/276 (15%)  | 0.33      | 0.08           | 1.41           | 0.14           |
| Loss of consciousness       | 44/315 (14%)         | 9/37 (24%)    | 35/278 (13%)  | 2.23      | 0.97           | 5.12           | 0.06           |
| Vertigo                     | 10/311 (3%)          | 0/37 (0%)     | 10/274 (4%)   | 1.00      | Omitted        | Omitted        |                |

|                             |               |             |               |      |         |         |         |
|-----------------------------|---------------|-------------|---------------|------|---------|---------|---------|
| Other symptoms              | 63/316 (20%)  | 4/37 (11%)  | 59/279 (21%)  | 0.45 | 0.15    | 1.33    | 0.15    |
| <b>Individual sign</b>      | n= (%)        | n= (%)      | n= (%)        | OR   | 95% LCI | 95% UCI | p value |
| Face weakness               | 46/313 (15%)  | 5/34 (15%)  | 41/279 (15%)  | 1.00 | 0.37    | 2.73    | 0.999   |
| Arm weakness                | 34/313 (11%)  | 7/34 (21%)  | 27/279 (10%)  | 2.42 | 0.96    | 6.08    | 0.06    |
| Leg weakness                | 40/313 (13%)  | 5/34 (15%)  | 35/279 (13%)  | 1.20 | 0.44    | 3.31    | 0.72    |
| Dysarthria                  | 13/312 (4%)   | 2/34 (6%)   | 114/278 (4%)  | 1.52 | 0.32    | 7.15    | 0.60    |
| Dysphasia                   | 9/312 (3%)    | 2/34 (6%)   | 7/278 (3%)    | 2.42 | 0.48    | 12.15   | 0.28    |
| Ataxia                      | 30/313 (10%)  | 1/34 (3%)   | 29/279 (10%)  | 0.26 | 0.03    | 1.98    | 0.19    |
| Inability to walk           | 45/309 (15%)  | 16/34 (47%) | 29/275 (11%)  | 7.54 | 3.47    | 16.38   | <0.0001 |
| Abnormal eye movement       | 26/311 (8%)   | 2/34 (6%)   | 24/277 (9%)   | 0.66 | 0.15    | 2.92    | 0.58    |
| Visual defects              | 25/311 (8%)   | 4/34 (12%)  | 21/277 (8%)   | 1.63 | 0.52    | 5.05    | 0.40    |
| Facial sensory disturbance  | 13/307 (4%)   | 1/34 (3%)   | 12/273 (4%)   | 0.66 | 0.08    | 5.23    | 0.69    |
| Arm sensory disturbance     | 26/309 (8%)   | 2/34 (6%)   | 24/275 (9%)   | 0.65 | 0.15    | 2.90    | 0.57    |
| Leg sensory disturbance     | 22/308 (7%)   | 2/34 (6%)   | 20/274 (7%)   | 0.79 | 0.18    | 3.55    | 0.76    |
| GCS abnormal (<15)          | 90/317 (29%)  | 20/37 (54%) | 70/280 (25%)  | 3.53 | 1.75    | 7.11    | <0.0001 |
| GCS<9                       | 18/317 (6%)   | 9/37 (24%)  | 9/280 (3%)    | 9.68 | 3.55    | 26.38   | <0.0001 |
| Abnormal pupil response     | 9/294 (3%)    | 3/34 (9%)   | 6/260 (2%)    | 4.10 | 0.98    | 17.21   | 0.05    |
| Sensory neglect             | 3/312 (0.6%)  | 1/34 (3%)   | 2/278 (0.7%)  | 4.18 | 0.37    | 47.38   | 0.25    |
| Other neurological signs    | 25/316 (8%)   | 2/37 (5%)   | 23/279 (8%)   | 0.64 | 0.14    | 2.81    | 0.55    |
| No focal neurological signs | 117/314 (37%) | 15/35 (43%) | 102/279 (37%) | 1.30 | 0.64    | 2.65    | 0.47    |

OR: unadjusted odds ratios. LCI: lower 95% confidence interval. UCI: Upper 95% confidence interval. n: number. %: percentage. GCS: Glasgow coma score. Other symptoms included pain or stiffness, lethargy, gait disturbance, fever, involuntary movements, nausea and irritability. Other signs included abnormal DTRs, confusion, altered consciousness or slowed mentation, involuntary movements, papilloedema.
